# Supplementary material for: Multiple DNA marker-assisted diversity analysis of Indian mango (Mangifera indica L.) populations
Source: Springer Nature journal article supplement (doi:10.1038/s41598-021-89470-3), 2021-05-14
Supplement: MOESM1 [file 41598_2021_89470_MOESM1_ESM-1.pdf]

# Multiple DNA Marker-Assisted Diversity Analysis of Indian Mango

## *(Mangifera indica L.)* Populations

Ram Chandra Jena and Pradeep Kumar Chand<sup>†</sup>

*Plant Biotechnology Laboratory, Post-Graduate Department of Botany, Utkal University,  
Bhubaneswar -751004, Odisha, India*

<sup>†</sup> **Corresponding author** : Dr. Pradeep Kumar Chand, e-mail: pkchand13@gmail.com

**Suppl. Table S1.** AMOVA analysis for 4 Geographic Populations (East India, West India, North India, South India) of selected Indian mangoes based on individual and cumulative DNA marker systems.

| Marker (s)                 | Source of variance | df | SS      | MS     | Est. Var. | Tot. Var. (%) | $\Phi_{PT}$ | <i>p</i> Value * |
|----------------------------|--------------------|----|---------|--------|-----------|---------------|-------------|------------------|
| <b>RAPD</b>                | Among populations  | 3  | 149.83  | 49.94  | 2.14      | 9             |             |                  |
|                            | Within population  | 54 | 1234.38 | 22.86  | 22.86     | 91            |             |                  |
|                            | Total              | 57 | 1384.21 |        | 25.00     | 100           | 0.086       | 0.000            |
| <b>ISSR</b>                | Among populations  | 3  | 17.90   | 5.97   | 0.18      | 5             |             |                  |
|                            | Within population  | 54 | 197.84  | 3.66   | 3.66      | 95            |             |                  |
|                            | Total              | 57 | 215.74  |        | 3.85      | 100           | 0.047       | 0.006            |
| <b>DAMD</b>                | Among populations  | 3  | 257.56  | 85.86  | 4.26      | 12            |             |                  |
|                            | Within population  | 54 | 1733.82 | 32.11  | 32.11     | 88            |             |                  |
|                            | Total              | 57 | 1991.38 |        | 36.36     | 100           | 0.117       | 0.000            |
| <b>SCoT</b>                | Among populations  | 3  | 40.59   | 13.53  | 0.30      | 3             |             |                  |
|                            | Within population  | 54 | 528.79  | 9.79   | 9.79      | 97            |             |                  |
|                            | Total              | 57 | 569.38  |        | 10.09     | 100           | 0.029       | 0.009            |
| <b>CBDP</b>                | Among populations  | 3  | 92.97   | 30.99  | 0.87      | 4             |             |                  |
|                            | Within population  | 54 | 1080.05 | 20.00  | 20.00     | 96            |             |                  |
|                            | Total              | 57 | 1173.02 |        | 20.87     | 100           | 0.042       | 0.001            |
| <b>SSR</b>                 | Among populations  | 3  | 294.50  | 98.17  | 5.12      | 13            |             |                  |
|                            | Within population  | 54 | 1811.90 | 33.55  | 33.55     | 87            |             |                  |
|                            | Total              | 57 | 2106.40 |        | 38.67     | 100           | 0.122       | 0.000            |
| <b>RAPD+ISSR<br/>+DAMD</b> | Among populations  | 3  | 434.20  | 144.73 | 6.63      | 10            |             |                  |
|                            | Within population  | 54 | 3293.84 | 61.00  | 61.00     | 90            |             |                  |
|                            | Total              | 57 | 3728.03 |        | 67.63     | 100           | 0.098       | 0.000            |
| <b>SCoT+CBDP</b>           | Among populations  | 3  | 133.55  | 44.52  | 1.17      | 4             |             |                  |
|                            | Within population  | 54 | 1608.84 | 29.79  | 29.79     | 96            |             |                  |
|                            | Total              | 57 | 1742.40 |        | 30.96     | 100           | 0.038       | 0.001            |

*df*: degree of freedom, *SS*: sum of squares, *MS*: mean of squares, *Est. Var.*: estimated variance, *Tot. Var. (%)*: percentage of total variance;  $\Phi_{PT}$ : coefficient of genetic differentiation. \* Significant test after 9999 random permutations.

**Suppl. Table S2.** AMOVA analysis for 3 Fruit Status Populations (Selection, Hybrid, Landrace) of selected Indian mangoes based on individual and cumulative DNA marker systems.

| Marker (s)            | Source of variance | df | SS      | MS     | Est. Var. | Tot. Var. (%) | $\Phi_{PT}$ | <i>p</i> Value * |
|-----------------------|--------------------|----|---------|--------|-----------|---------------|-------------|------------------|
| <b>RAPD</b>           | Among populations  | 2  | 181.90  | 90.95  | 3.01      | 11            |             |                  |
|                       | Within population  | 55 | 1809.48 | 32.90  | 32.90     | 89            |             |                  |
|                       | Total              | 57 | 1991.38 |        | 35.91     | 100           | 0.084       | 0.000            |
| <b>ISSR</b>           | Among populations  | 2  | 84.23   | 42.11  | 0.96      | 5             |             |                  |
|                       | Within population  | 55 | 1299.98 | 23.64  | 23.64     | 95            |             |                  |
|                       | Total              | 57 | 1384.21 |        | 24.60     | 100           | 0.052       | 0.001            |
| <b>DAMD</b>           | Among populations  | 2  | 22.18   | 11.09  | 0.26      | 4             |             |                  |
|                       | Within population  | 55 | 330.27  | 6.01   | 6.01      | 96            |             |                  |
|                       | Total              | 57 | 352.45  |        | 6.27      | 100           | 0.042       | 0.000            |
| <b>SCoT</b>           | Among populations  | 2  | 29.96   | 14.98  | 0.27      | 3             |             |                  |
|                       | Within population  | 55 | 539.42  | 9.81   | 9.81      | 97            |             |                  |
|                       | Total              | 57 | 569.38  |        | 10.08     | 100           | 0.027       | 0.004            |
| <b>CBDP</b>           | Among populations  | 2  | 62.99   | 31.50  | 0.59      | 3             |             |                  |
|                       | Within population  | 55 | 1110.03 | 20.18  | 20.18     | 97            |             |                  |
|                       | Total              | 57 | 1173.02 |        | 20.77     | 100           | 0.028       | 0.004            |
| <b>SSR</b>            | Among populations  | 2  | 14.96   | 7.48   | 0.20      | 4             |             |                  |
|                       | Within population  | 55 | 200.78  | 3.65   | 3.65      | 96            |             |                  |
|                       | Total              | 57 | 215.74  |        | 3.85      | 100           | 0.039       | 0.000            |
| <b>RAPD+ISSR+DAMD</b> | Among populations  | 2  | 288.31  | 144.15 | 4.24      | 6             |             |                  |
|                       | Within population  | 55 | 3439.73 | 62.54  | 62.54     | 94            |             |                  |
|                       | Total              | 57 | 3728.03 |        | 66.78     | 100           | 0.063       | 0.000            |
| <b>SCoT+CBDP</b>      | Among populations  | 2  | 92.95   | 46.48  | 0.86      | 3             |             |                  |
|                       | Within population  | 55 | 1649.45 | 29.99  | 29.99     | 97            |             |                  |
|                       | Total              | 57 | 1742.40 |        | 30.85     | 100           | 0.028       | 0.002            |

*df*: degree of freedom, *SS*: sum of squares, *MS*: mean of squares, *Est. Var.*: estimated variance, *Tot. Var. (%)*: percentage of total variance;  $\Phi_{PT}$ : coefficient of genetic differentiation. \* Significant test after 9999 random permutations.

**Suppl. Table S3.** Matrix of unbiased genetic identity and distance among 4 Geographical Populations of selected Indian mangoes based on cumulative Arbitrary (RAPD + ISSR + DAMD), cumulative Gene targeted (SCoT + CBDP) and SSR marker systems.

| RAPD + ISSR+DAMD |      |      |      |      |
|------------------|------|------|------|------|
| Population       | EI   | WI   | NI   | SI   |
| EI               | **** | 0.83 | 0.90 | 0.93 |
| WI               | 0.17 | **** | 0.90 | 0.88 |
| NI               | 0.10 | 0.10 | **** | 0.91 |
| SI               | 0.07 | 0.12 | 0.09 | **** |
| SCoT + CBDP      |      |      |      |      |
| Population       | EI   | WI   | NI   | SI   |
| EI               | **** | 0.91 | 0.92 | 0.95 |
| WI               | 0.09 | **** | 0.91 | 0.90 |
| NI               | 0.08 | 0.09 | **** | 0.93 |
| SI               | 0.05 | 0.10 | 0.07 | **** |
| SSR              |      |      |      |      |
| Population       | EI   | WI   | NI   | SI   |
| EI               | **** | 0.81 | 0.86 | 0.94 |
| WI               | 0.19 | **** | 0.91 | 0.88 |
| NI               | 0.14 | 0.09 | **** | 0.85 |
| SI               | 0.06 | 0.12 | 0.15 | **** |

*Nei's (1972) genetic identity (above diagonal) and genetic distance (below diagonal). Cells with \*\*\*\* are for the same populations. EI: East India, WI: West India; NI: North India; SI: South India*

**Suppl. Table S4.** Matrix of unbiased genetic identity and distance among 3 Fruit Status Populations of selected Indian mangoes based on cumulative Arbitrary (RAPD + ISSR + DAMD), cumulative Gene targeted (SCoT + CBDP) and SSR marker systems.

| <b>RAPD + ISSR + DAMD</b> |      |      |      |
|---------------------------|------|------|------|
| Population                | S    | H    | L    |
| S                         | **** | 0.96 | 0.91 |
| H                         | 0.04 | **** | 0.96 |
| L                         | 0.09 | 0.04 | **** |
| <b>SCoT + CBDP</b>        |      |      |      |
| Population                | S    | H    | L    |
| S                         | **** | 0.97 | 0.94 |
| H                         | 0.03 | **** | 0.94 |
| L                         | 0.06 | 0.06 | **** |
| <b>SSR</b>                |      |      |      |
| Population                | S    | H    | L    |
| S                         | **** | 0.96 | 0.92 |
| H                         | 0.04 | **** | 0.92 |
| L                         | 0.08 | 0.08 | **** |

*Nei's (1972) genetic identity (above diagonal) and genetic distance (below diagonal). Cells with \*\*\*\* are for the same populations. S: Selection, H: Hybrid and L: Landrace*

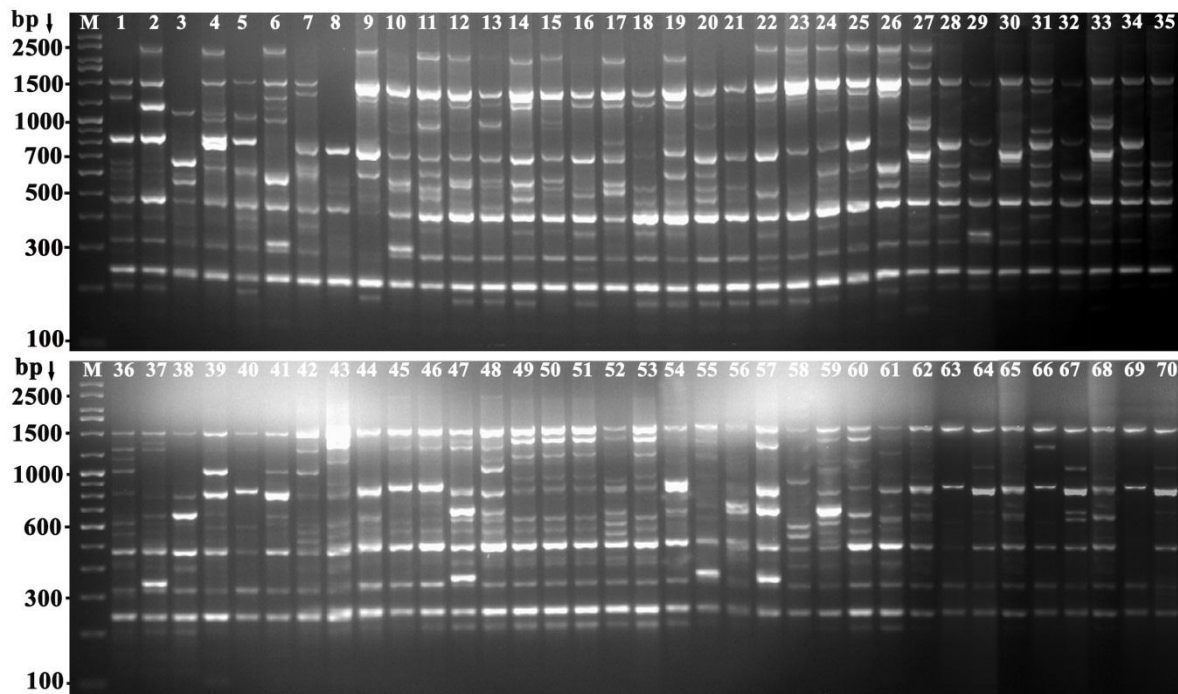

**Suppl. Fig. 1a.** RAPD profiling of 70 selected Indian mango genotypes using primer OPA 18. Lane M: Low Range DNA Ruler Plus. Lanes 1-70 correspond to the mango genotypes (Listed in Table 1).

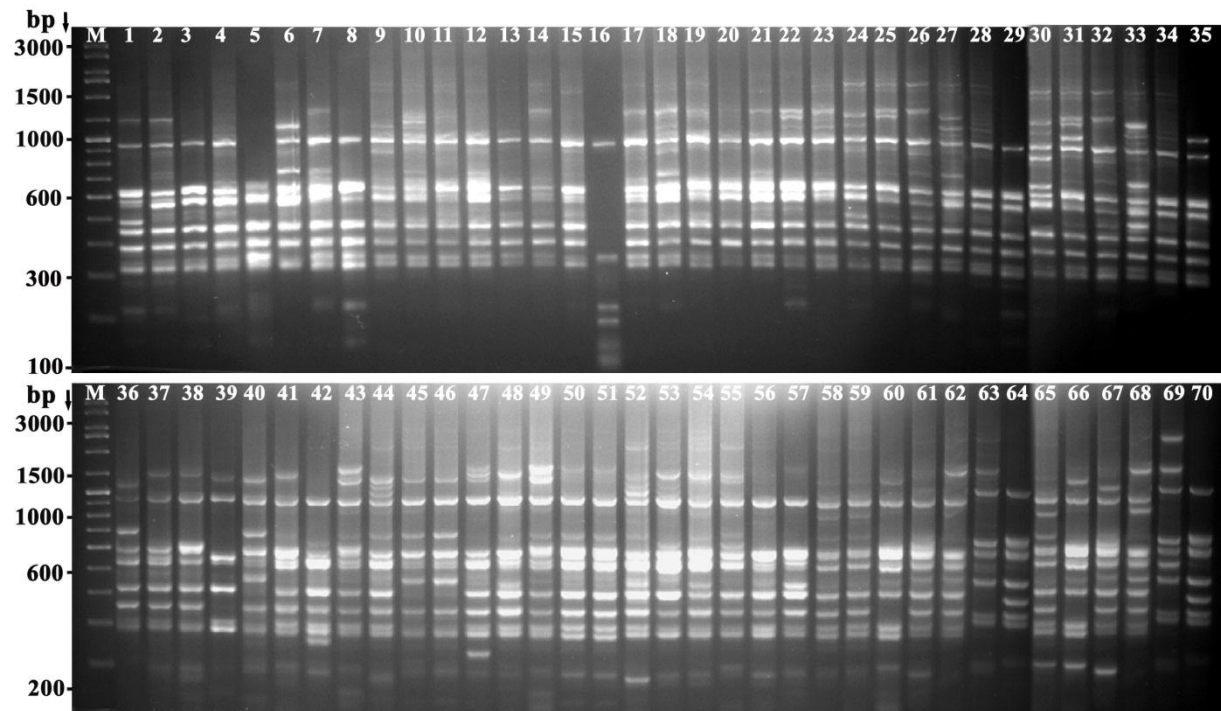

**Suppl. Fig. 1b.** ISSR profiling of 70 selected Indian mango genotypes using primer ISSR-9. Lane M: Low Range DNA Ruler Plus. Lanes 1-70 correspond to the mango genotypes (Listed in Table 1).

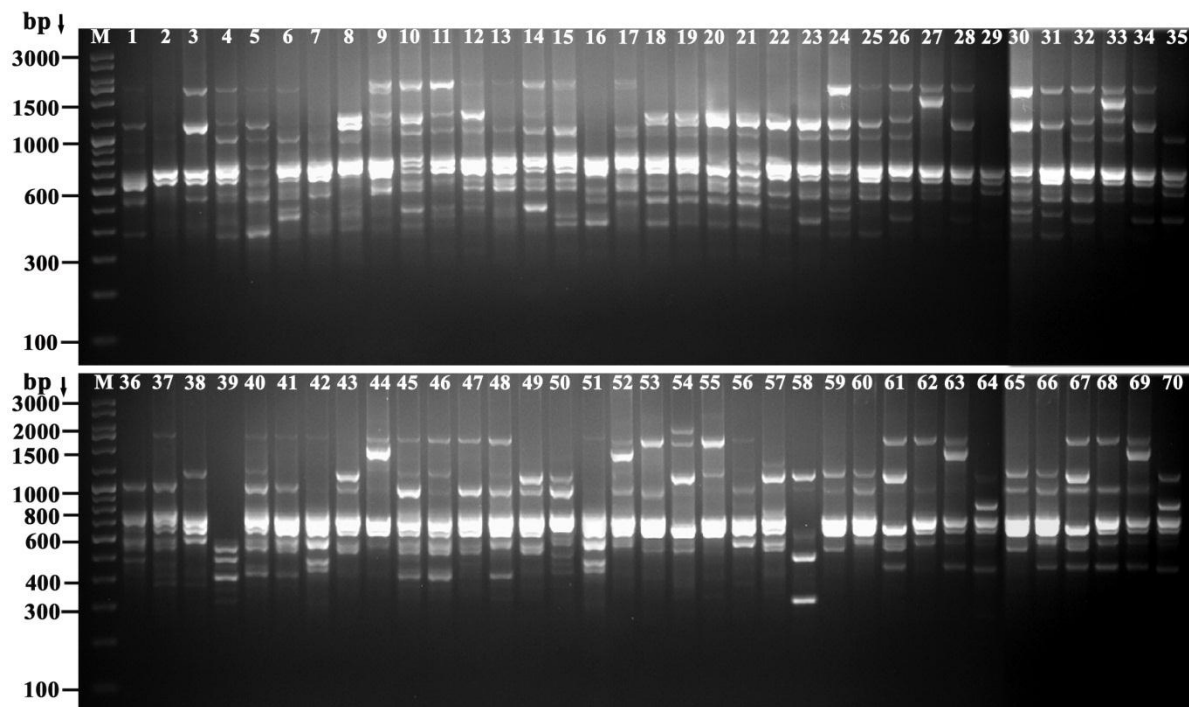

**Suppl. Fig. 1c.** DAMD profiling of 70 selected Indian mango genotypes using primer HBV. Lane M: Low Range DNA Ruler Plus. Lanes 1-70 correspond to the mango genotypes (Listed in Table 1).

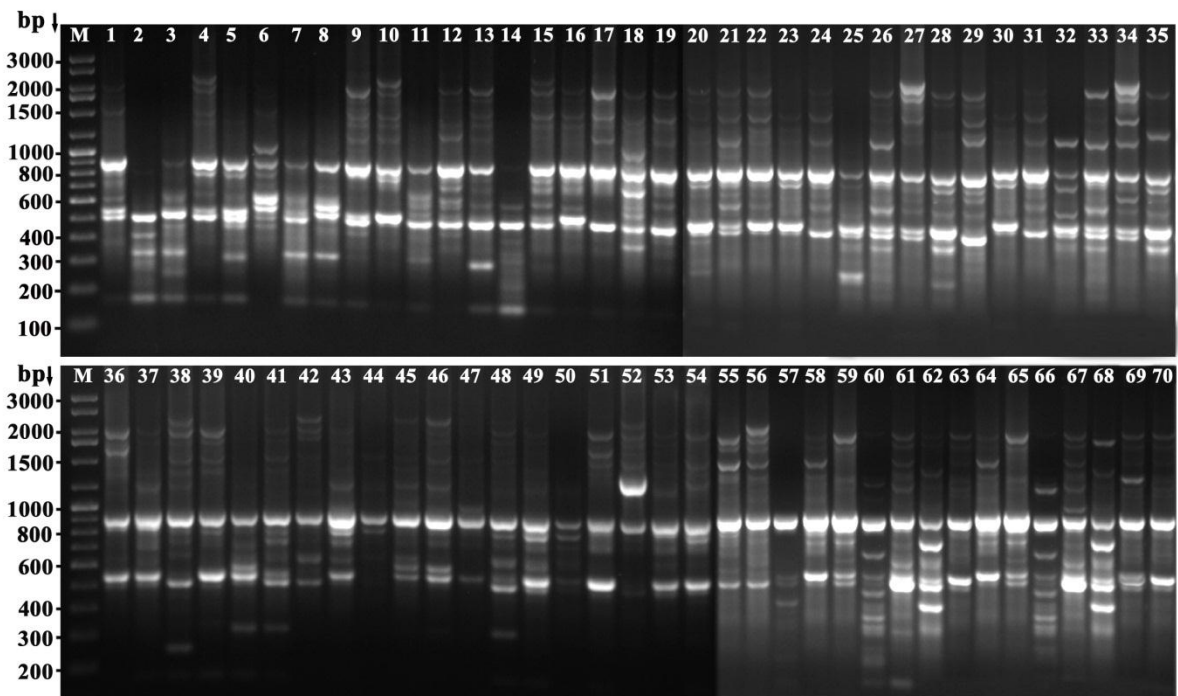

**Suppl. Fig. 1d.** SCoT profiling of 70 selected Indian mango genotypes using primer SCoT 8. Lane M: Low Range DNA Ruler Plus. Lanes 1-70 correspond to the mango genotypes (Listed in Table 1).

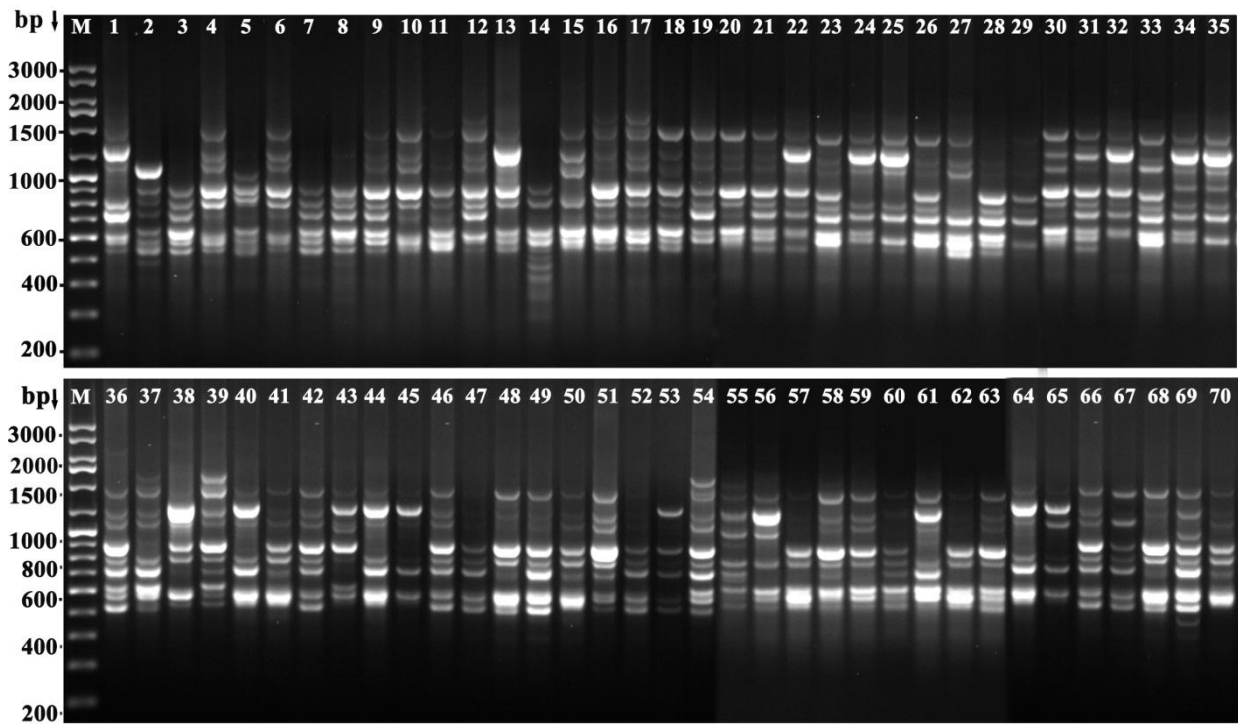

**Suppl. Fig. 1e.** CDBP profiling of 70 selected Indian mango genotypes using primer CAAT-3. Lane M: Low Range DNA Ruler Plus. Lanes 1-70 correspond to the mango genotypes (Listed in Table 1).

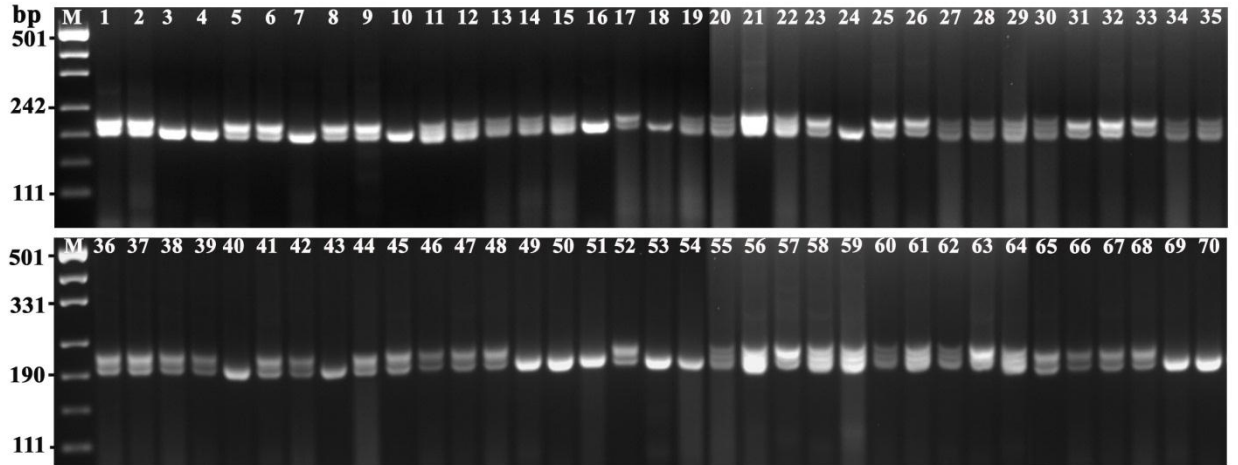

**Suppl. Fig. 1f .** SSR profiling of 70 selected Indian mango genotypes using primer SSR-20. Lane M: pUC19/DNA Msp I digest. Lanes 1-70 correspond to the mango genotypes (Listed in Table 1).

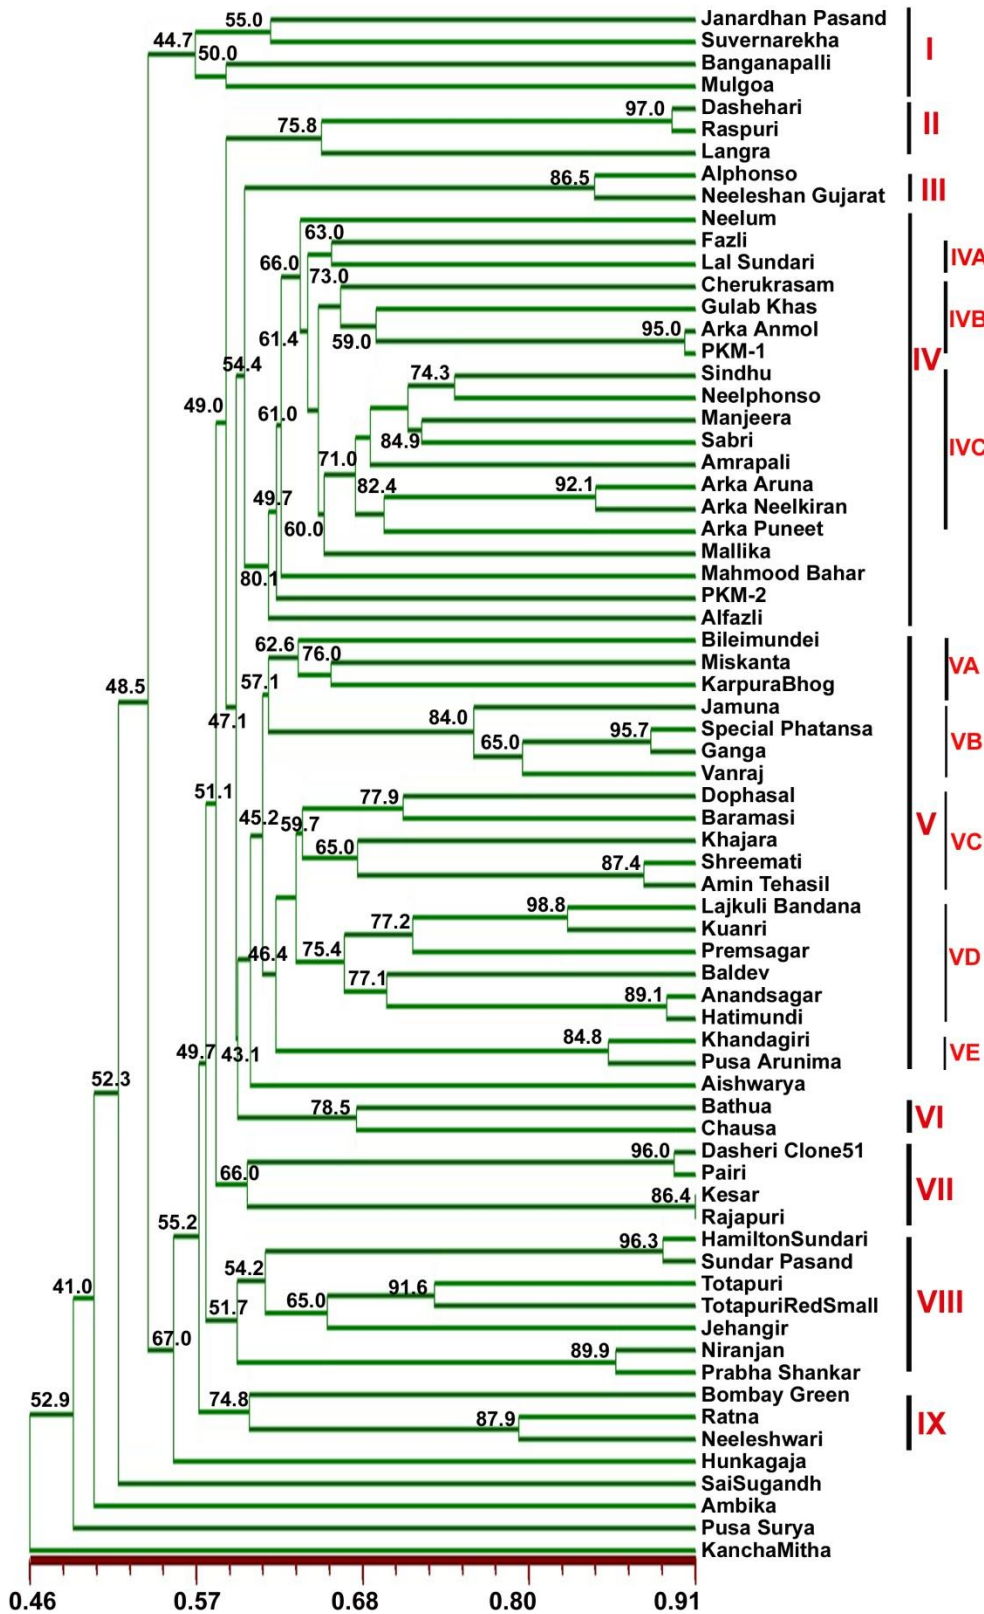

**Suppl. Fig. 2a:** Dendrogram of 70 Indian mango genotypes constructed based on cumulative RAPD+ISSR+DAMD+SCoT+CBDP+SSR markers using UPGMA method. (Numbers indicate mango genotypes as listed in Table 1, Values at the nodes correspond to bootstrap support [1000 replications])

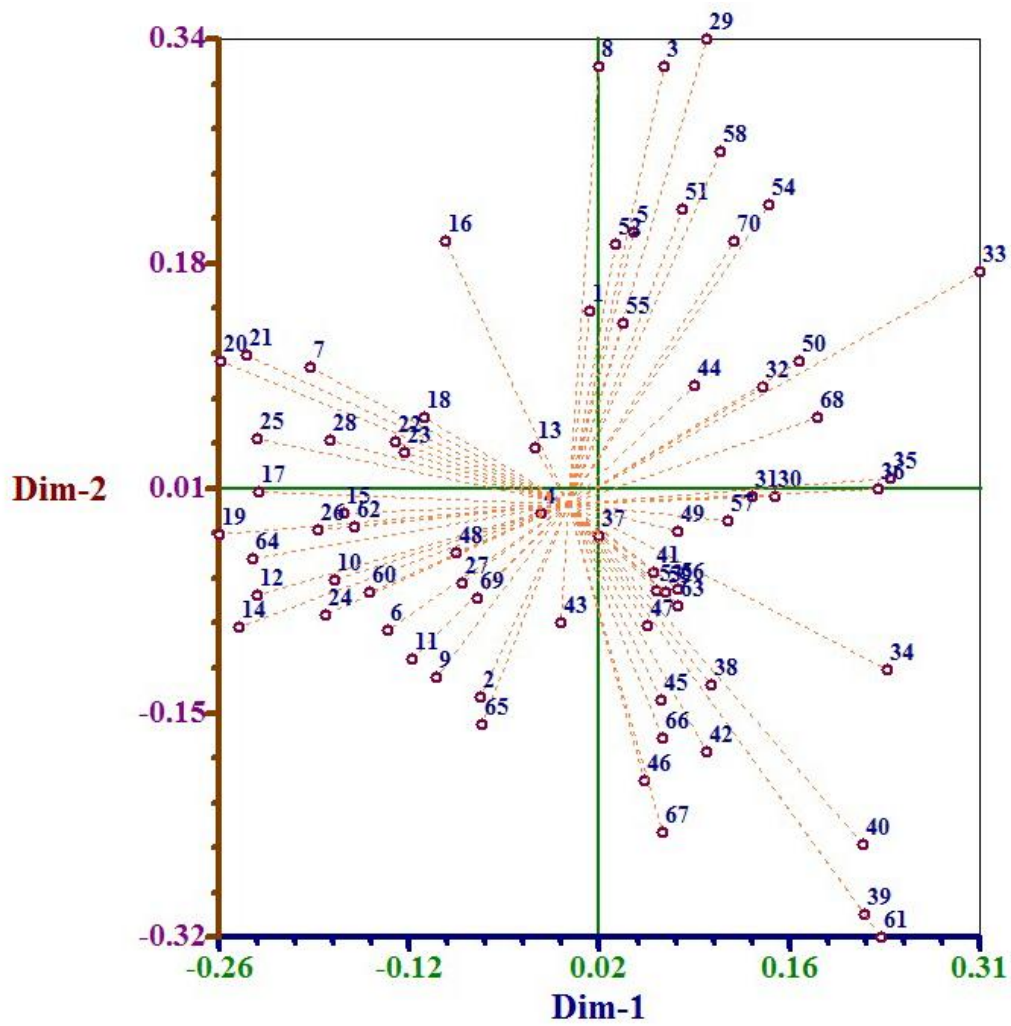

**Suppl. Fig. 2b:** Two dimensional distribution of 70 selected Indian mango genotypes by PCA using cumulative RAPD+ISSR+DAMD+SCoT+CBDP+SSR markers. Numbers plotted (1-70) represent individual genotypes as listed in Table 1

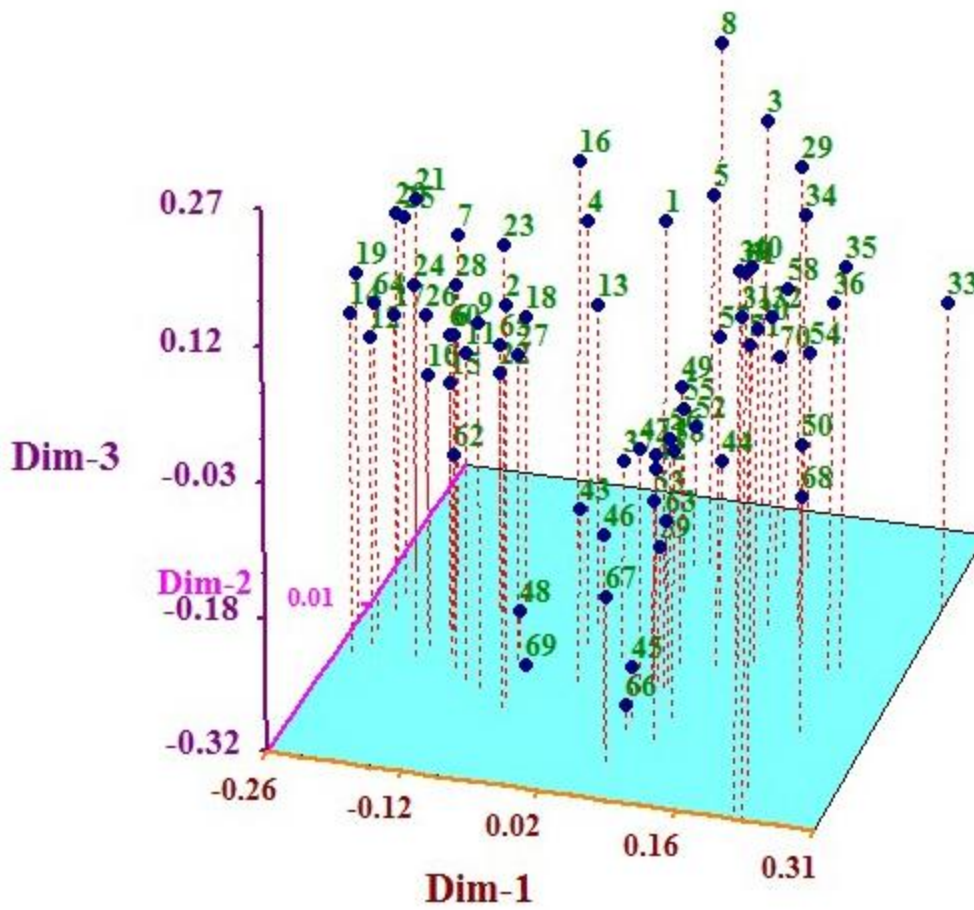

**Suppl. Fig. 2c:** Three dimensional distribution of 70 selected Indian mango genotypes revealed by PCA analysis based on cumulative RAPD+ISSR+DAMD+SCoT+CBDP+SSR markers data. Numbers plotted (1-70) represent individual genotypes as listed in Table 1
